# Supplementary material for: Influence of the Interactions at the Graphene–Substrate Boundary on Graphene Sensitivity to UV Irradiation
Source: MDPI journal article supplement (doi:10.3390/ma12233949), 2019-11-28
Supplement: s1 [file s1]

Supplementary Materials

# Influence of the Interactions at the Graphene–Substrate Boundary on Graphene Sensitivity to UV Irradiation

Dorota Nowak <sup>1,\*</sup>, Marian Clapa <sup>1,2</sup>, Piotr Kula <sup>1</sup>, Mariusz Sochacki <sup>3</sup>, Bartłomiej Stonio<sup>3</sup>, Maciej Galazka <sup>2</sup>, Marcin Pelka <sup>2</sup>, Dominika Kuten <sup>2</sup> and Piotr Niedzielski <sup>1</sup>

**Table S1.** State of the substrates surface before transfer and the quality of graphene on final substratum.

| Substratum                                                                          | Substratum + Graphene                                                                |
|-------------------------------------------------------------------------------------|--------------------------------------------------------------------------------------|
| <b>Quartz Glass</b>                                                                 |                                                                                      |
| 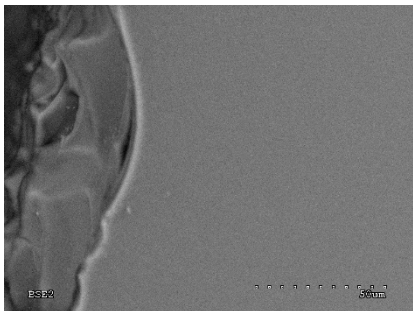  |   |
| <b>PTFE</b>                                                                         |                                                                                      |
|  |  |
| <b>kapton</b>                                                                       |                                                                                      |
|  |  |
| <b>PEN</b>                                                                          |                                                                                      |

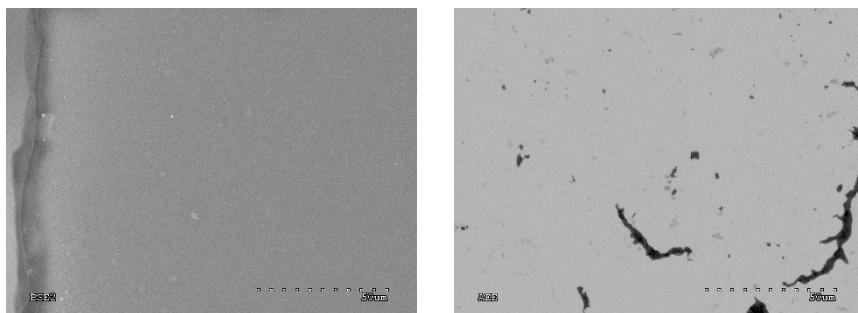

Raman mapping was performed for graphene transferred on Si/SiO<sub>2</sub> substrate before UV irradiation to check the homogeneity of graphene. Figure S1 exhibits Raman I<sub>2D</sub>/I<sub>G</sub> mapping. Figure S2 shows the fitting of 2D band for trilayer graphene.

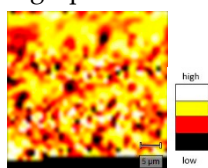

**Figure S1.** Raman I<sub>2D</sub>/I<sub>G</sub> imaging of graphene on Si/SiO<sub>2</sub>.

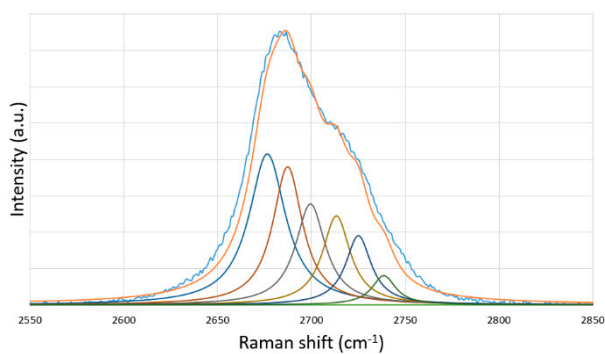

**Figure S2.** Fitting of 2D band for trilayer graphene.

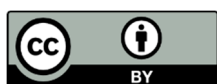

© 2019 by the authors. Submitted for possible open access publication under the terms and conditions of the Creative Commons Attribution (CC BY) license (<http://creativecommons.org/licenses/by/4.0/>).
